# Supplementary material
Source: MDPI journal article supplement (https://www.mdpi.com/2409-515X/5/4/40)
Supplement: s1 [file s1]

## Draft Supplementary data

### S1. Absence of DNA contamination on punch head

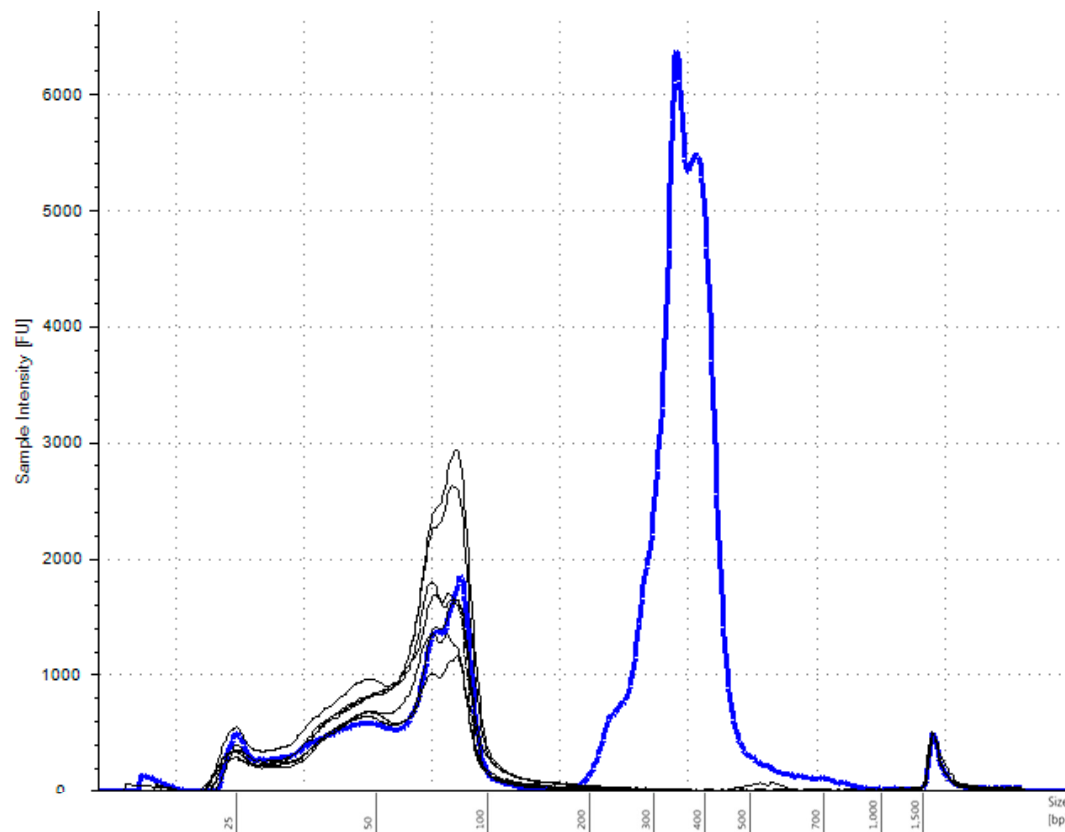

**Supplementary Figure 1.** Absence of DNA contamination on punch head. TapeStation traces of final libraries prepared from eluate from six standard blank Guthrie card punches (Punch 1 to Punch 6; black lines) vs. a library prepared from eluate from one 6mm dried blood spot punch (blue line).

Blank Guthrie card disks were punched using a punch head that had not been cleaned after a routine day of newborn screening service punching, and subjected to the high throughput DNA extraction and library preparation protocols (as described in Materials and Methods; see main text). When these libraries were assessed on the TapeStation alongside a library prepared from a dried blood spot sample in the same way, a large library peak was detected in the library prepared from a dried blood spot but not in the libraries prepared from blank Guthrie cards. This indicates a negligible amount of amplifiable DNA is present on the punch head. Cross-contamination arising from this is thus considered unlikely.

15

## S2. Automated DNA extraction protocol for Dried Blood Spots

| 1. Purification wash x2         |    | 2. Elution wash            |    | 3. Elution                         |
|---------------------------------|----|----------------------------|----|------------------------------------|
| Add 125µl Purification solution |    | Add 125µl Elution solution |    | Add 60µl Elution solution-         |
| Pipette mix                     |    | Pipette mix                |    | Incubate 99°C 15 min               |
| Add 125µl Purification solution |    | Add 125µl Elution solution |    | Pulse spin                         |
| Pipette mix                     |    | Pipette mix                |    | Shake 1400rpm 1 min                |
| Shake 900rpm 100s               |    | Shake 900rpm 100s          |    | Pulse spin                         |
| Incubate room temp 250s         | x2 | Incubate room temp 250s    | x2 | Transfer 60µl supernatant to plate |
| Pipette mix                     |    | Pipette mix                |    |                                    |
| Shake 900rpm 100s               |    | Shake 900rpm 100s          |    |                                    |
| Remove 250µl supernatant        | x2 | Remove 250µl supernatant   | x2 |                                    |
| Wash tips                       |    | Wash tips                  |    |                                    |

16

**Supplementary Figure 2.** Automated protocol used on the Biomek FXP for high throughput DNA extraction from

17

Dried Blood Spots.

## S3. Semi-automated protocol for AmpliSeq library preparation

| 1. AmpliSeq reaction setup (repeat protocol for second primer pool) | 2. Combine amplified library pools                                                        | 3. Adapter ligation reaction setup                                    | 4. Equimolar pooling (volumes based on library molarity)      |
|---------------------------------------------------------------------|-------------------------------------------------------------------------------------------|-----------------------------------------------------------------------|---------------------------------------------------------------|
| Transfer 5uL primer pool into reaction plate                        | Transfer 10uL from reaction plate containing pool 2 into reaction plate containing pool 1 | Transfer 210uL Switch solution into tube for mastermix                | Transfer appropriate volume of water into pooling tube        |
| Add 2uL HiFi Mastermix                                              | Pipette mix                                                                               | Transfer 105uL Ligase into tube for mastermix                         | Transfer appropriate volume of each library into pooling tube |
| Add 3uL DBS DNA                                                     |                                                                                           | Pipette mix                                                           |                                                               |
| Pipette mix                                                         |                                                                                           | Add 6uL mastermix (Switch solution plus ligase) to reaction plate     |                                                               |
|                                                                     |                                                                                           | Transfer 1.5uL molecular barcode from 96-well plate to reaction plate |                                                               |
|                                                                     |                                                                                           |                                                                       |                                                               |

19 **Supplementary Figure 3.** Semi-automated protocol used on the Biomek NXp for high throughput AmpliSeq  
20 library preparation.

## 21

## 22

23  
24  
25  
26

## 27

28

29  
30  
31  
32  
33

34

35  
36  
37  
38

39  
40  
41

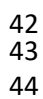

42  
43  
44

# *Concordance of variant calling, DBS vs. VB samples*

| Sample | No. matching variants | No. unique in DBS | No. unique in VB | No. unique due to low coverage | Concordance excluding low coverage (%) |
|--------|-----------------------|-------------------|------------------|--------------------------------|----------------------------------------|
| BO     | 91                    | 0                 | 1                |                                | 98.9                                   |
| BR     | 92                    | 1                 | 2                | 2                              | 98.9                                   |
| BS     | 102                   | 1                 | 1                | 1                              | 99.0                                   |
| BT     | 96                    | 0                 | 0                |                                | 100.0                                  |
| BU     | 94                    | 1                 | 2                |                                | 96.9                                   |
| BV     | 92                    | 0                 | 0                |                                | 100.0                                  |
| BW     | 108                   | 0                 | 1                |                                | 99.1                                   |
| BX     | 86                    | 3                 | 3                | 2                              | 95.6                                   |
| BA     | 101                   | 0                 | 1                |                                | 99.0                                   |
| BB     | 84                    | 20                | 0                | 20                             | 100.0                                  |
| BC     | 98                    | 1                 | 2                |                                | 97.0                                   |
| BD     | 113                   | 0                 | 0                |                                | 100.0                                  |
| BE     | 101                   | 1                 | 0                |                                | 99.0                                   |
| MB     | 93                    | 3                 | 2                |                                | 94.9                                   |
| MA     | 97                    | 2                 | 0                |                                | 98.0                                   |
| MC     | 99                    | 2                 | 1                |                                | 97.1                                   |
| MD     | 83                    | 2                 | 0                |                                | 97.6                                   |
| ME     | 106                   | 1                 | 1                |                                | 98.1                                   |
| MF     | 103                   | 0                 | 0                |                                | 100.0                                  |
| MG     | 88                    | 0                 | 2                |                                | 97.8                                   |
| MH     | 67                    | 0                 | 41               | 40                             | 98.5                                   |
| MI     | 96                    | 3                 | 0                |                                | 97.0                                   |
| MJ     | 85                    | 2                 | 3                | 2                              | 96.6                                   |
| AF     | 84                    | 0                 | 2                |                                | 97.7                                   |
| AG     | 94                    | 3                 | 0                |                                | 96.9                                   |
| AH     | 92                    | 1                 | 3                |                                | 95.8                                   |
| AJ     | 79                    | 3                 | 2                |                                | 94.0                                   |
| AL     | 98                    | 0                 | 0                |                                | 100.0                                  |
| AM     | 93                    | 1                 | 2                |                                | 95.9                                   |
| AN     | 90                    | 0                 | 1                |                                | 98.9                                   |
| AO     | 98                    | 1                 | 1                |                                | 98.0                                   |
| AP     | 101                   | 2                 | 2                |                                | 96.2                                   |
| AQ     | 95                    | 2                 | 2                |                                | 96.0                                   |

**Supplementary Table 1.** Comparison of variant calls from Venous blood (VB) and Dried Blood Spot (DBS) extraction methods for 33 samples.

Many of the discordances had a quality score below 30, and therefore are very likely to be false positive calls. Many of the discordances were located outside of exons. The genotypes of three positions over 13 samples were confirmed using Sanger. Sample 'BX' had an extra DBS variant called at chr7: 117232481 (*CFTR* exon 14) which was not present in the equivalent VB sample; this was confirmed as a true heterozygous variant through Sanger sequencing. The likely cause of this discordance is amplification of only the reference allele in the VB sample. The remaining two positions were confirmed as false positive calls in all samples they were

57 sequenced in; chr14:81528568 in sample 'MB' having a low QUAL score in the variant call (23),  
58 and chr14:81610296 across several samples appearing to have strand bias. Clarification of a  
59 further two discrepant variants through Sanger sequencing was unsuccessful as they were  
60 located in poly-T tracts.

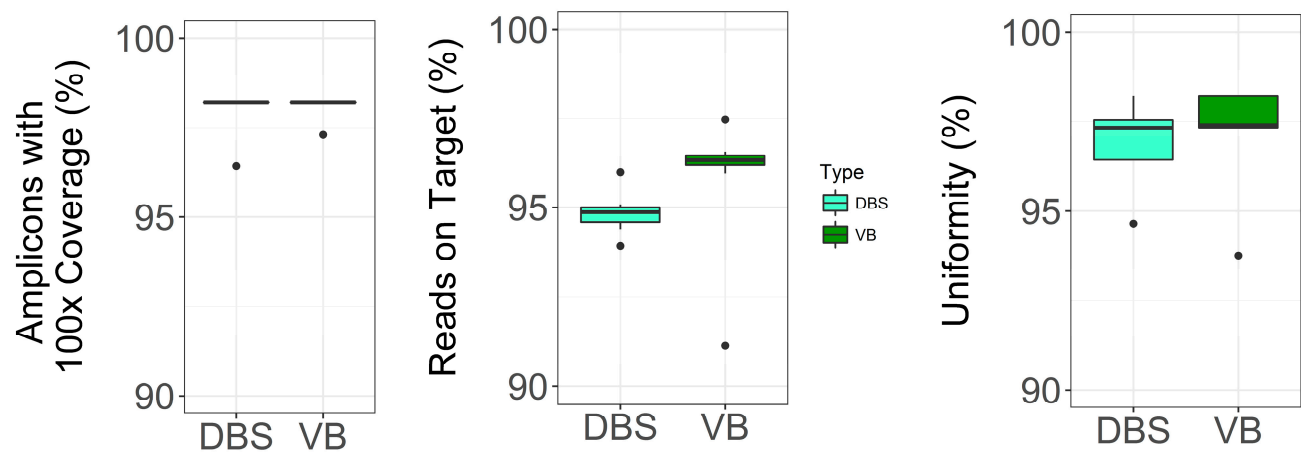

**Supplementary Figure 5.** Percentage of amplicons with 100x coverage, reads on target and uniformity in dried blood spot (DBS) vs. venous blood (VB) samples

S6. Manual vs. automated sequencing

Sequencing quality metrics indicated that uniformity of reads across amplicons was higher in libraries prepared using automation compared to manually prepared libraries ( $p=0.0001068^*$ , Wilcoxon Rank Test), as was the percentage of reads on target ( $p < 2.2 \times 10^{-16}$ , Wilcoxon Rank Test). Libraries prepared using automation were slightly smaller in molarity than those prepared manually but this was not statistically significant and had no impact on sequencing as all libraries are diluted to an approximately identical molarity during final library pooling.

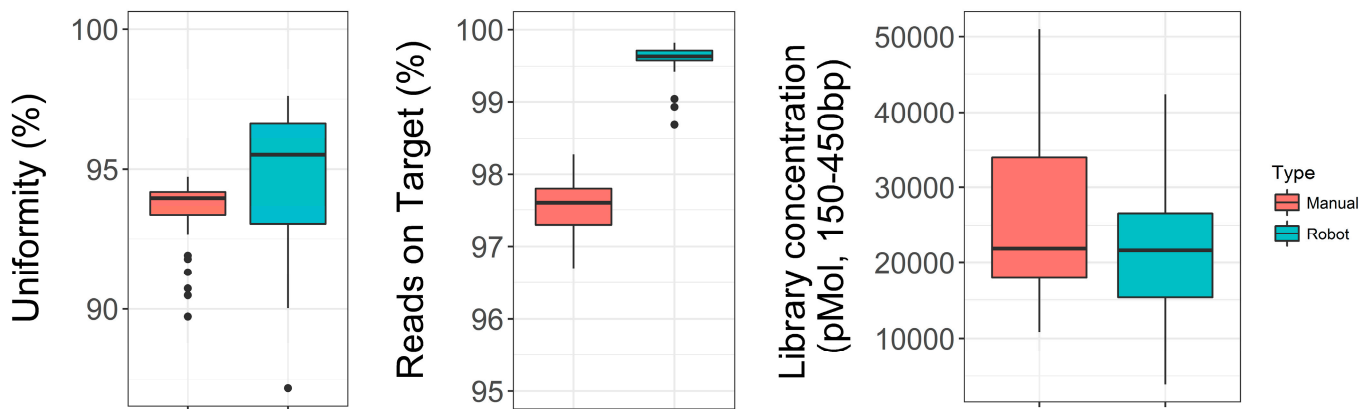

**Supplementary Figure 6.** Sequencing quality metrics, manual vs. automated library preparation. Sample input was DNA isolated from venous blood.

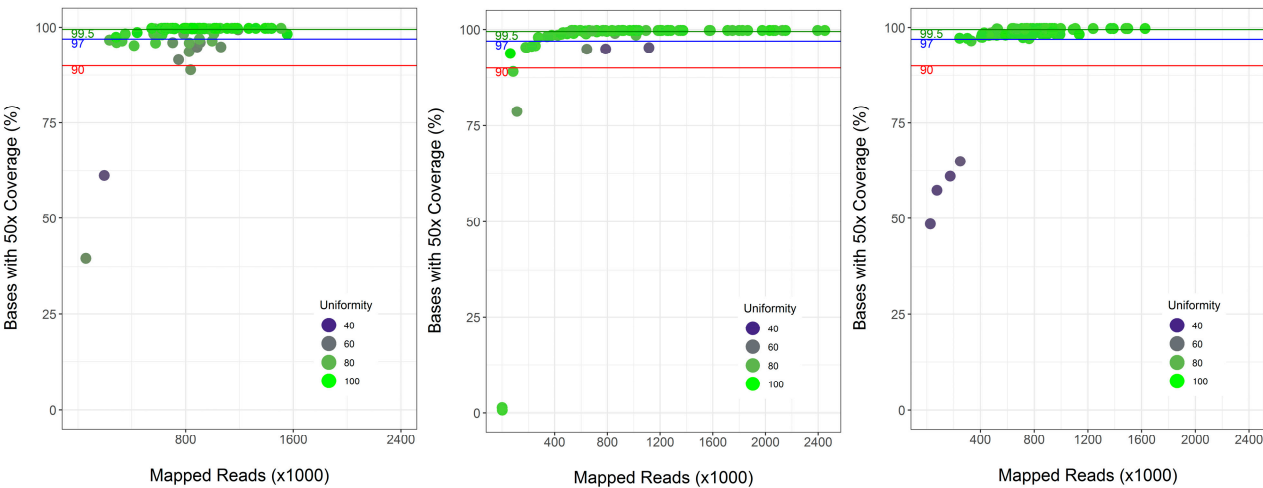

**Supplementary Figure 7.** Quality of three high throughput sequencing runs from Dried Blood Spots on Ion S5 sequencer. Libraries were prepared using the semi-automated AmpliSeq library preparation process. 96 samples were sequenced on each run.



76 S7. Timings of high throughput process for two 96-well plates

77

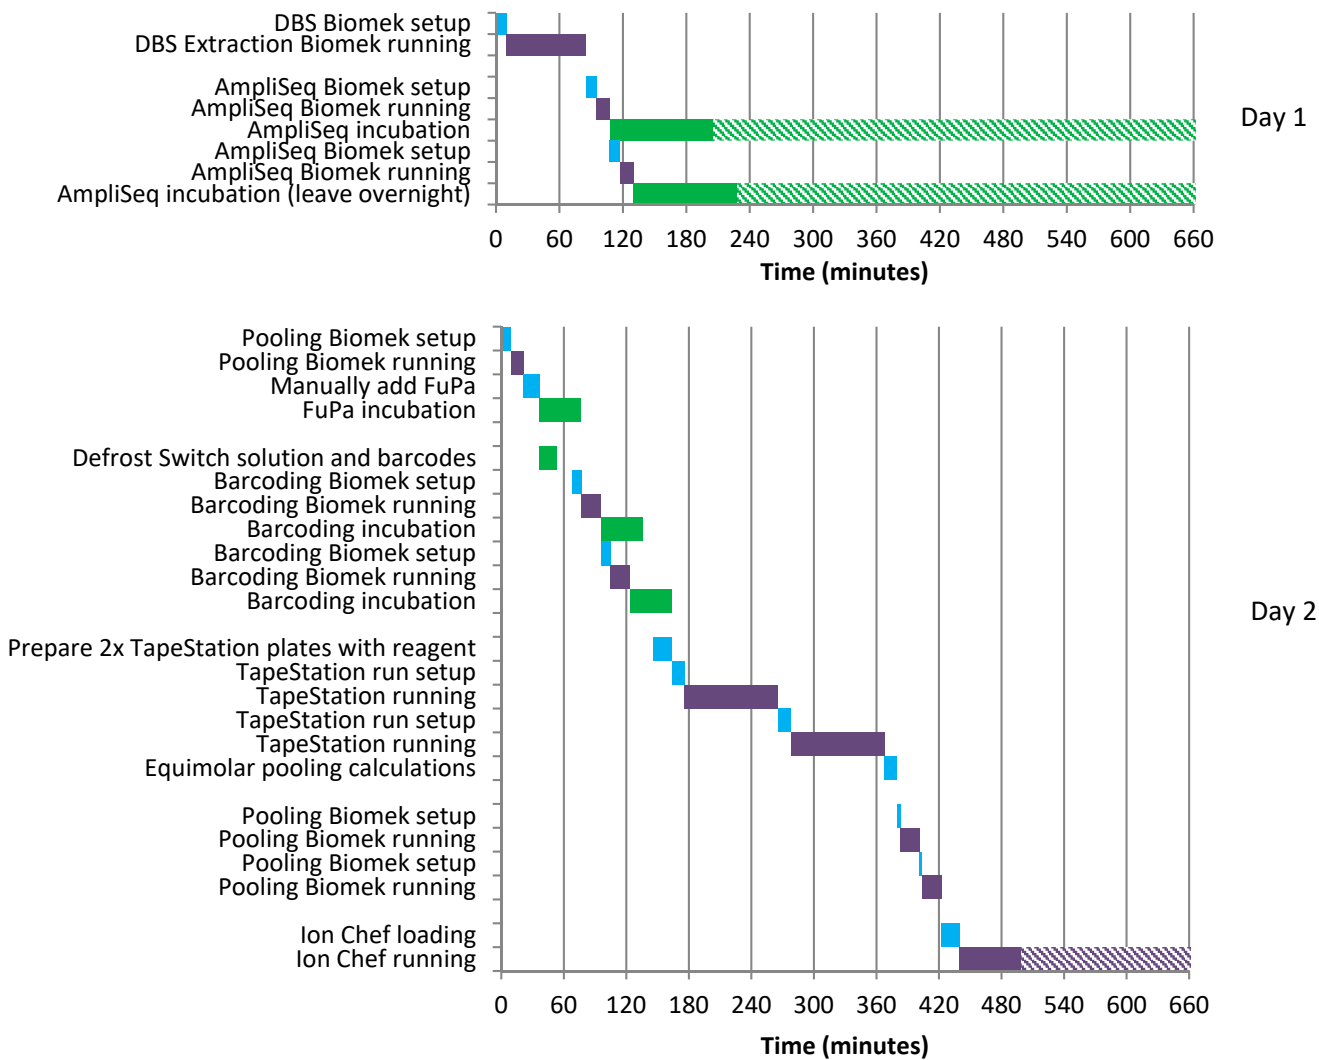

78

79 **Supplementary Figure 8.** Detailed timings for automated DBS DNA extraction, AmpliSeq library preparation, Ion  
80 Chef chip loading and sequencing. Purple bars: liquid handling platform running. Blue: manual step. Green:  
81 incubation. Dashed bars represent overnight steps.
